# Supplementary material for: Thermoresponsive cryogels reinforced with cellulose nanocrystals
Source: Royal Society of Chemistry journal article supplement (doi:10.1039/c5ra12603g), 2015-01-01
Supplement: c5ra12603g1.pdf [file c5ra12603g1.pdf]

Electronic Supporting Information:  
Thermoresponsive cryogels reinforced with cellulose  
nanocrystals

*Emma Larsson, Assya Boujemaoui, Eva Malmström and Anna Carlmark\**

KTH Royal Institute of Technology, School of Chemical Science and Engineering,

Fibre and Polymer Technology, Teknikringen 56, SE-100 44, Stockholm, Sweden

\*Corresponding authors: [annac@kth.se](mailto:annac@kth.se)

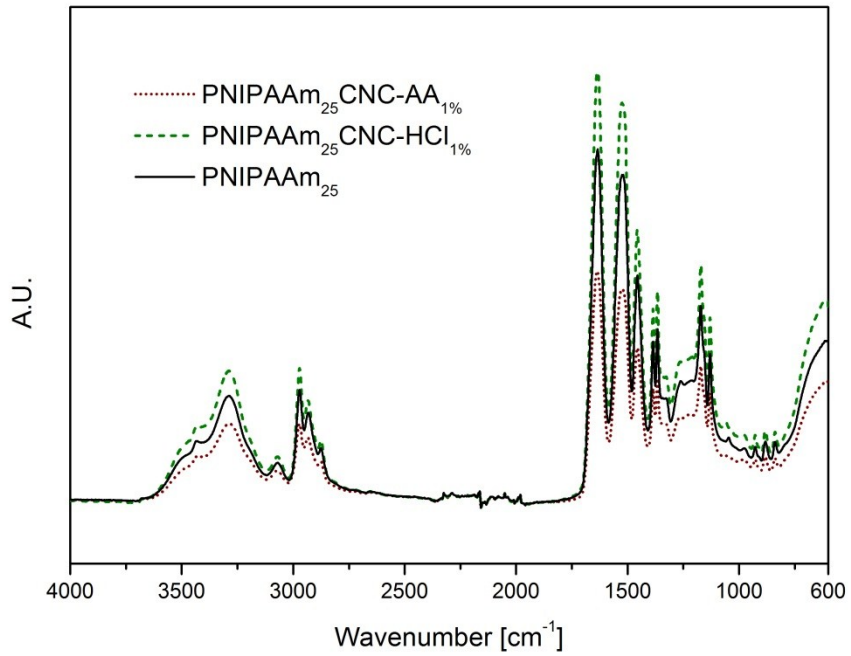

ESI Figure 1. FT-IR spectra of cryogels containing 1 wt% of CNC.

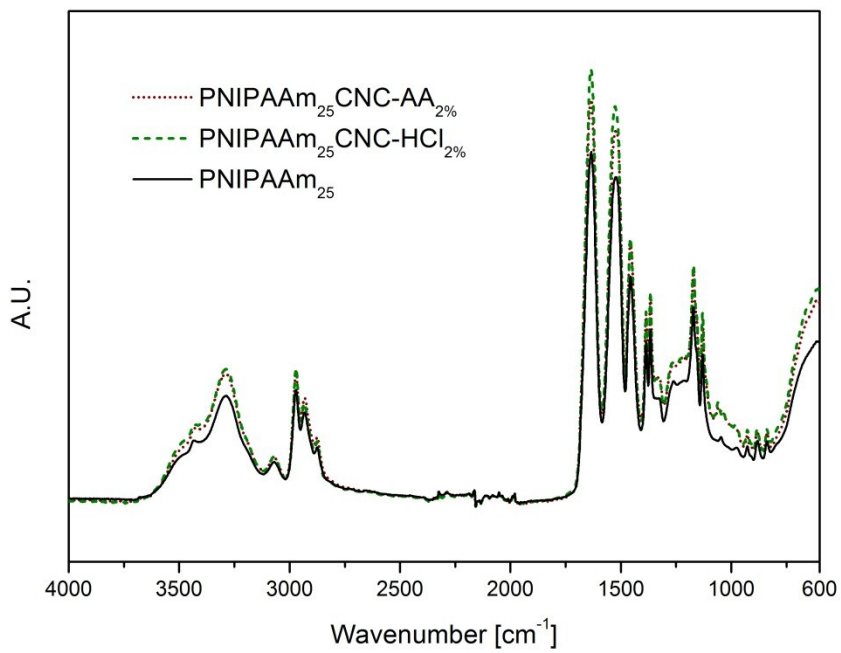

ESI Figure 2. FT-IR spectra of cryogels containing 2 wt% of CNC.

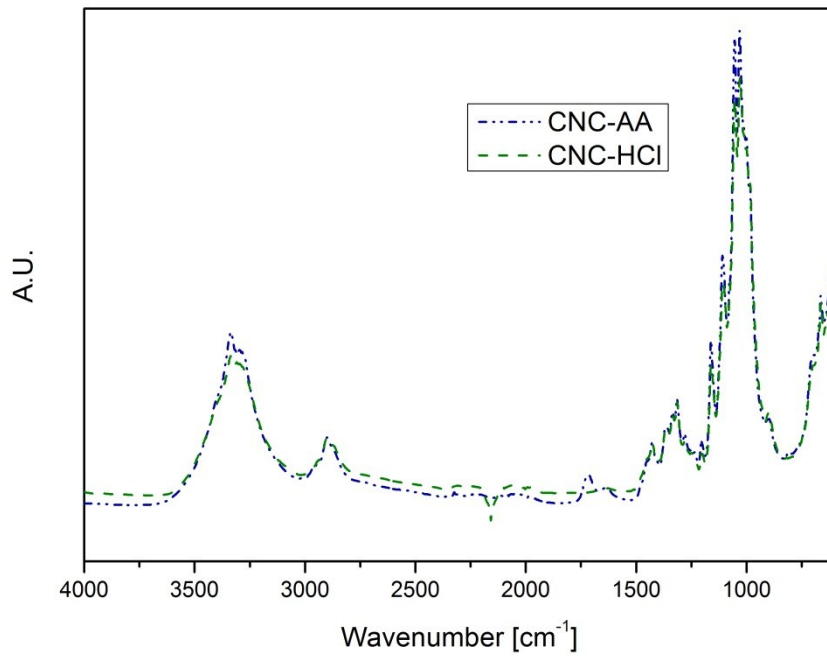

ESI Figure 3. FT-IR spectra of CNC-HCl and CNC-AA.

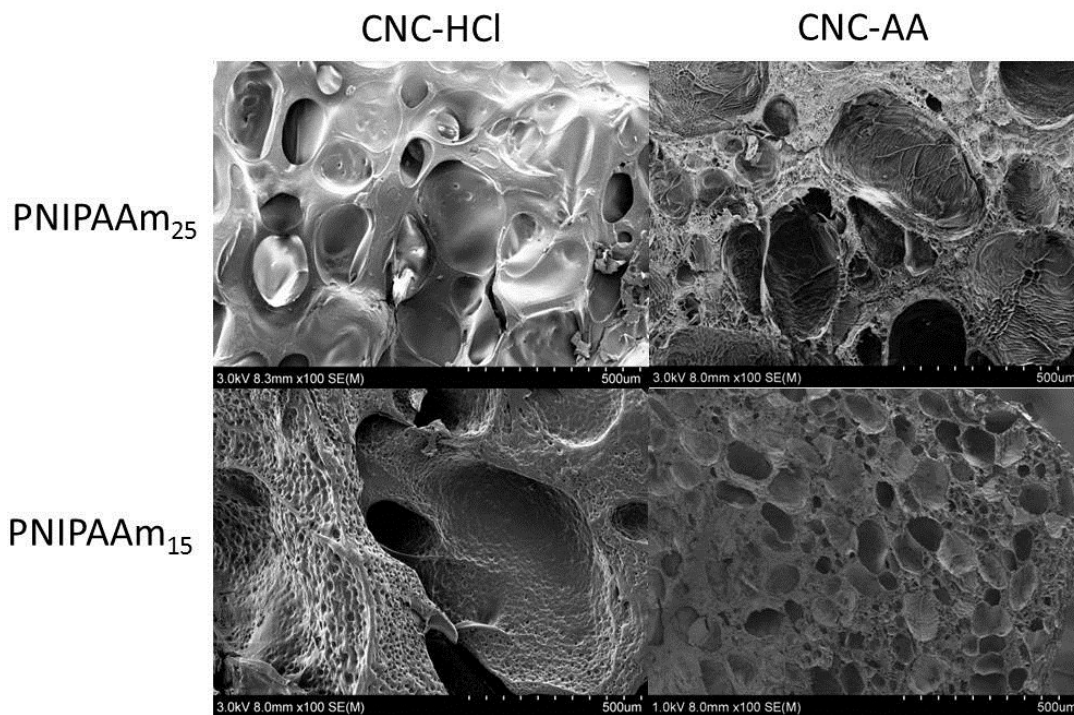

ESI Figure 4. FE-SEM of PNIPAAm cryogels containing 2 wt% of CNC at  $\times 100$  magnification.

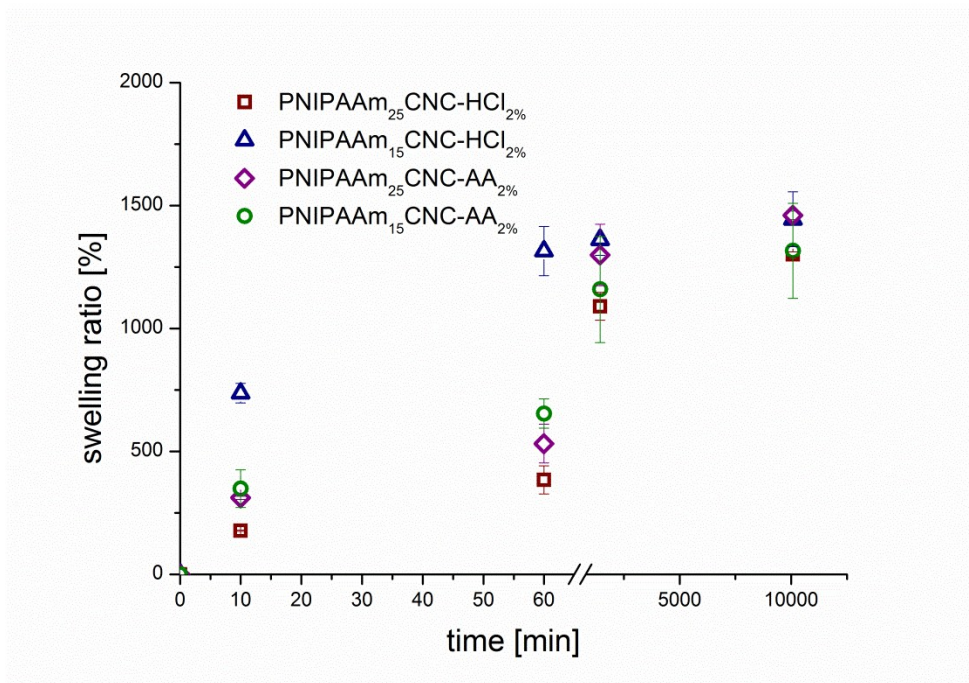

ESI Figure 5. Swelling ratio of freeze dried cryogels containing 2 wt% of CNC.

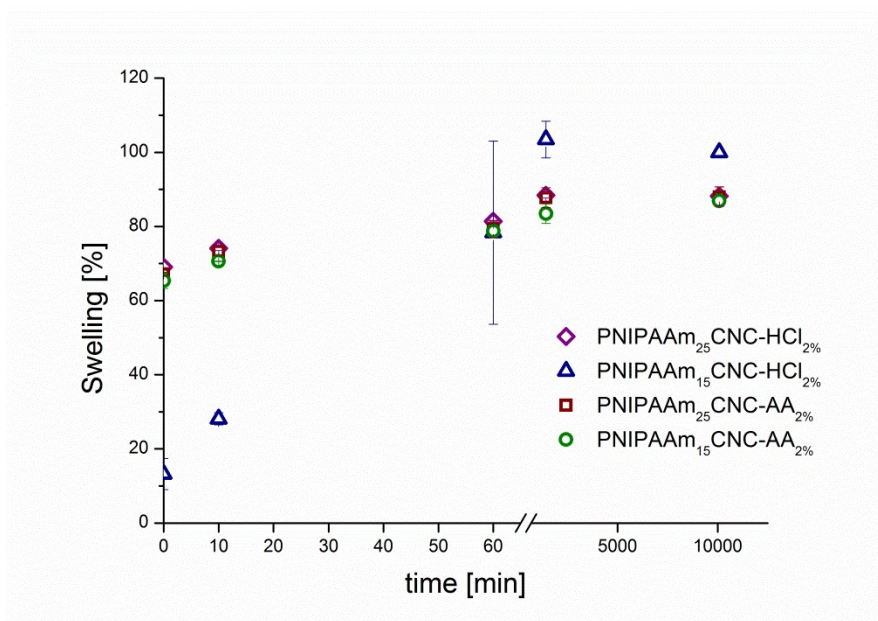

ESI Figure 6. Mass percentage of original mass for cryogels containing 2 wt% of CNC below the LCST of PNIPAAm

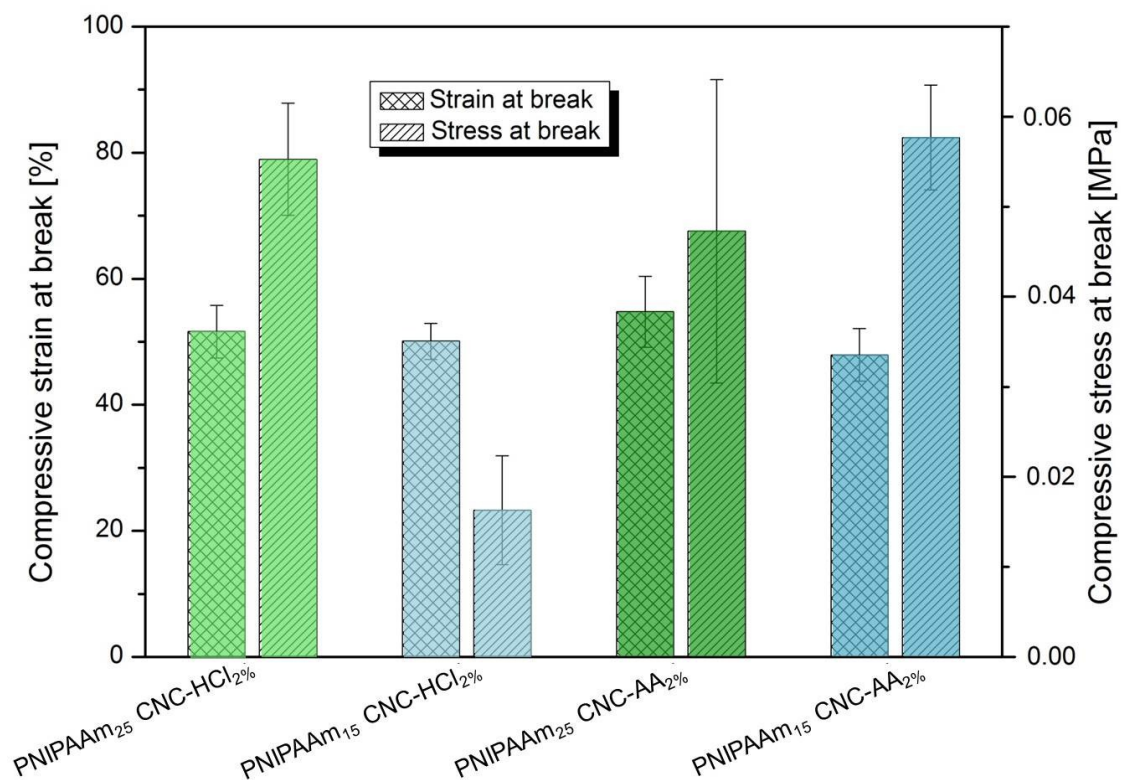

ESI Figure 7. Compressive strain and compressive stress at break for the synthesized cryogels containing 2 % of CNC.
